# Supplementary material
Source: ML conference proceedings conference paper supplement (https://openaccess.thecvf.com/content/CVPR2022/html/Bai_Scanline_Homographies_for_CVPR_2022_paper.html)
Supplement: Supplementary file 1 [file Bai_Scanline_Homographies_for_CVPR_2022_supplemental.pdf]

# Supplementary Material: Scanline Homographies for Rolling-Shutter Plane Absolute Pose

Fang Bai, Agniva Sengupta, Adrien Bartoli

ENCOV, TGI, Institut Pascal, UMR6602 CNRS, Université Clermont Auvergne, France

fang.bai@yahoo.com, i.agniva@gmail.com, adrien.bartoli@gmail.com

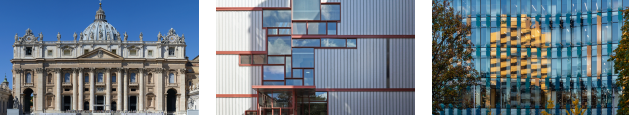

Figure 1. Facade from St. Peter's Basilica, Pratt Institute of Architecture in Brooklyn and Deloitte building in Christchurch, New Zealand, has been used as the textures for RS1, RS2 and RS3

## 1. Additional Results

The synthetic experiments are generated with three publicly available textures from the facade of some famous architectures. The three textures, named RS1, RS2, RS3, are shown in Fig. 1. The synthetic RS images generated from them are given in Table 1.

We tested the synthetic data on all parameterisation ( $\mathcal{P}$ ) of polynomial curves and B-Splines. The complete results are given in three parts through Table 1 (for p11111 and p11122), Table 2 (for p22222 to p33333-c66666) and Table 3 (for p33333-c77777 to p33333-c1313131313).

| $\mathcal{P}$ | RS1 | RS2 | RS3 |
|---------------|-----|-----|-----|
| RS Images     |     |     |     |
| p11111        |     |     |     |
| p11122        |     |     |     |

Table 1. The top-most row shows the input RS images while the two rows below shows the rectified image for the parameterisations: p11111 and p11122. Feature correspondences have been marked in green

| $\mathcal{P}$ | RS1 | RS2 | RS3 |
|---------------|-----|-----|-----|
| p22222        |     |     |     |
| p22233        |     |     |     |
| p33333        |     |     |     |
| p1111-c33333  |     |     |     |
| p11122-c33344 |     |     |     |
| p22222-c44444 |     |     |     |
| p22233-c44455 |     |     |     |
| p33333-c55555 |     |     |     |
| p33333-c66666 |     |     |     |

Table 2. Rectification results from p22222 to p33333-c66666

The accuracy of estimated translation is plotted for one dataset (RS3) in Figure (2). It is important to note that the

| $\mathcal{P}$             | RS1                                                                                 | RS2                                                                                 | RS3                                                                                 |
|---------------------------|-------------------------------------------------------------------------------------|-------------------------------------------------------------------------------------|-------------------------------------------------------------------------------------|
| p33333-c7777              |    |    |    |
| p33333-c8888              |    |    |    |
| p33333-c9999              |    |    |    |
| p33333-c1010101010        |    |    |    |
| p33333-c1111111111        |    |    |    |
| p33333-c1212121212        |    |    |    |
| p33333-c1313131313        |   |   |   |
| Bsplinep33333-cl313131313 |  |  |  |

Table 3. Rectification results from p33333-c7777 to p33333-c1313131313

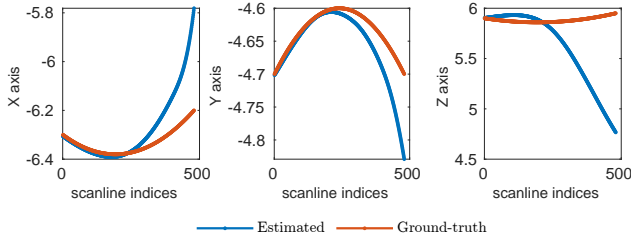

Figure 2. Estimated and groundtruth translation along X, Y and Z axis for RS3

pose estimation along Z-axis is always less accurate than X and Y axis for all dataset tested upon.

Some other simulated data generated using the Blender software, with correspondences obtained automatically (SIFT) are shown in Table (4). We compare our rectification results qualitatively to those obtained from commercial softwares [2] and [1]. The rectification quality from our approach always recovers the rectangular outline of the template with reasonable accuracy even in the highly challeng-

|           | RS4                                                                                | RS5                                                                                 | RS6                                                                                 | RS7                                                                                 |
|-----------|------------------------------------------------------------------------------------|-------------------------------------------------------------------------------------|-------------------------------------------------------------------------------------|-------------------------------------------------------------------------------------|
| RS Images | 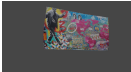 |  |  |  |
| Ours      |  |  |  |  |
| [2]       |  |  |  |  |
| [1]       |  |  |  |  |

Table 4. Rectification of synthetic RS images using automatic correspondences. The input RS images are given in the top row, the rectified images from our method is given in the second row while rectification using commercial softwares [2] and [1] are given in the third and the fourth row respectively

ing cases while the commercial softwares are significantly less accurate in rectification.

## References

- [1] Microsoft Corporation. Image composite editor, 2015. 2
- [2] Adobe Inc. Adobe photoshop cs6, 2012. 2
